# Supplementary material for: Linking longitudinal and cross-sectional biomarker data to understand host-pathogen dynamics: Leptospira in California sea lions (Zalophus californianus) as a case study
Source: PLoS Negl Trop Dis. 2020 Jun 29;14(6):e0008407. doi: 10.1371/journal.pntd.0008407 (PMC7351238; doi:10.1371/journal.pntd.0008407)
Supplement: S1 Table — In parentheses are the number of animals shedding leptospires for each log2 antibody titer level over the total number of PCR tested animals. (DOCX) [file pntd.0008407.s001.docx]

**S1 Table.** Total number of sea lions with a given log2 antibody titer by year for wild-caught (WILD), stranded (STRAND) and subclinically infected (SUB1 and SUB2) sea lions. In parentheses are the number of animals shedding leptospires for each log2 antibody titer level over the total number of PCR tested animals.

|  | WILD | | | | | | | STRAND | | | | | | | SUB1 | | | SUB2 | | |
| --- | --- | --- | --- | --- | --- | --- | --- | --- | --- | --- | --- | --- | --- | --- | --- | --- | --- | --- | --- | --- |
| Titer | | 10 | 11 | 12 | 13 | 14 | Total | | 10 | 11 | 12 | 13 | 14 | Total | | 11 | 12 | | 11 | 12 |
| 0 | | 79 (1/41) | 79 (5/70) | 108 (21/93) | 142 (0/134) | 260 (0/251) | 668 (27/589) | | 100 (0/13) | 38 (2/12) | 40 (1/10) | 49 (0/18) | 114 (0/22) | 341 (3/75) | | - | 1 | | - | - |
| 1 | | - | - | - | - | 6 (0/6) | 6 (0/6) | | - | 1 | 2 (0/1) | - | 3 | 6 (0/1) | | - | 5 | | - | - |
| 2 | | - | - | - | - | 5 (0/5) | 5 (0/5) | | 3 (0/1) | - | 3 | 3 (0/1) | 1 | 10 (0/2) | | - | 1 | | - | - |
| 3 | | - | 1 (1/1) | 1 (1/1) | 1 (0/1) | 3 (0/3) | 5 (2/6) | | 1 | 1 (0/1) | 2 (0/2) | 3 (1/3) | 1 (0/1) | 8 (1/7) | | - | 2 | | - | 1 |
| 4 | | - | 1 (1/1) | 1 (0/1) | - | 2 (0/2) | 4 (1/4) | | - | 2 (0/1) | - | 3 (0/3) | - | 5 (0/4) | | 1 (1) | - | | - | 4 |
| 5 | | - | 1 (1/1) | - | - | - | 1 (1/1) | | - | 1 (0/1) | - | 2 (0/2) | 2 (0/1) | 5 (0/4) | | - | - | | 1 | 2 |
| 6 | | 2 (2/2) | 1 (1/1) | 1 (1/1) | - | - | 4 (4/4) | | - | 2 (0/1) | - | 1 (0/1) | - | 3 (0/2) | | - | - | | - | - |
| 7 | | 1 (1/1) | 4 (3/4) | - | - | - | 5 (4/5) | | - | 2 (1/1) | - | - | - | 2 (1/1) | | 2 | - | | 1 | - |
| 8 | | - | 1 (1/1) | 1 (1/1) | - | - | 2 (2/2) | | 2 | 3 (1/1) | 1 | 1 | - | 7 (1/1) | | - | - | | - | - |
| 9 | | - | 3 (2/3) | - | - | - | 3 (2/3) | | 3 | 9 (2/3) | 5 (1/1) | - | - | 20 (4/7) | | - | - | | 1 | - |
| 10 | | 1 (1/1) | 3 (3/3) | 1 (1/1) | - | - | 5 (5/5) | | 8 (3/4) | 23 (7/8 | 7 | - | - | 38 (10/12) | | - | - | | 1 | - |
| 11 | | 1 | 2 (2/2) | - | - | - | 3 (2/2) | | 3 (1/1) | 60 (14/14) | 4 (0/1) | - | - | 67 (12/13) | | - | - | | - | - |
| 12 | | - | 3 (3/3) | 1 (1/1) | - | - | 4 (4/4) | | 5 (2/2) | 41 (9/9) | 1 (1/1) | - | - | 47 (12/12) | | - | - | | - | - |
| 13 | | 1 (1/1) | - | - | - | - | 1 (1/1) | | 3 (1/1) | 10 (4/4) | 2 | - | - | 15 (5/5) | | - | - | | - | - |
| 14 | | - | - | - | - | - | - | | 1 | 2 (1/1) | 1 (1/1) | - | - | 4 (2/2) | | - | - | | - | - |
